# Supplementary material for: Bioremediation of Oil Contaminated Soil and Restoration of Land Historically Polluted with Oil Products in the Agricultural Circuit in the Plain and Western Hills, Romania
Source: MDPI journal article supplement (doi:10.3390/app131810245), 2023-09-12
Supplement: s1 [file s1]

Supplementary Files S1.

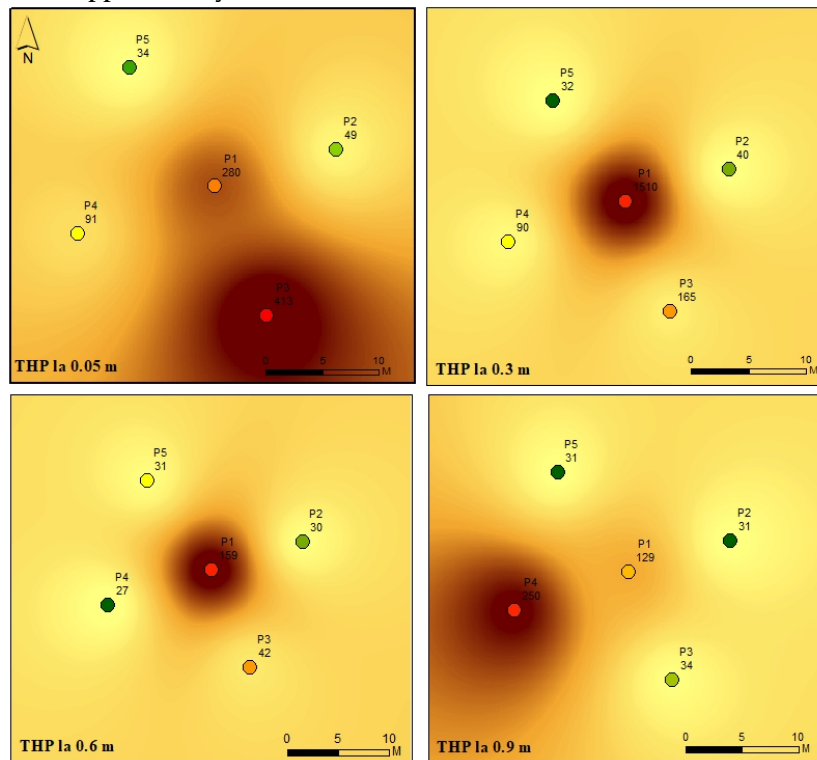

A. Modeled values of TPH concentrations for Probe 251 Sărișoara Nouă

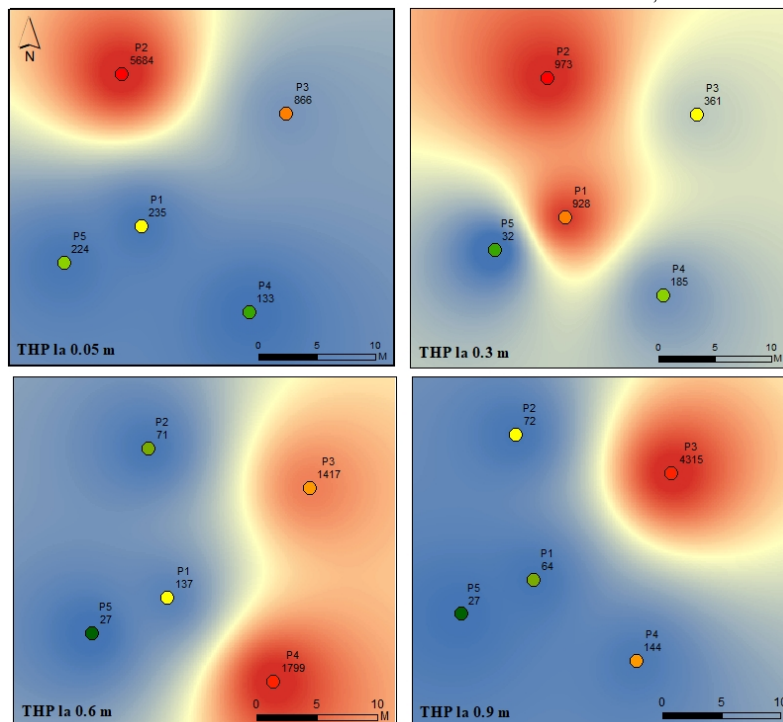

B. Modeled values of TPH concentrations for Probe 560 Mihai Bravu Vest

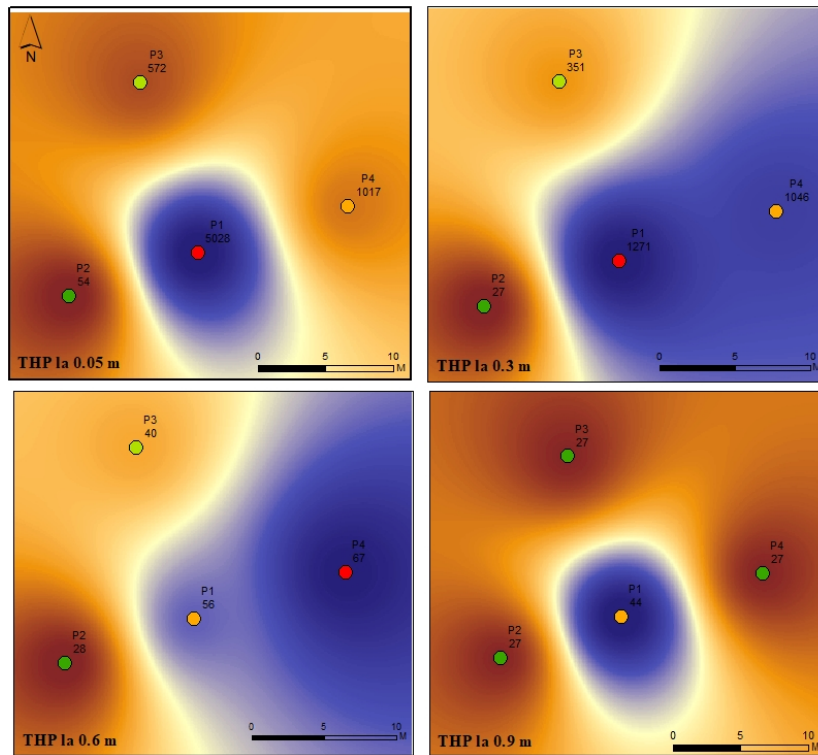

C. Modeled values of TPH concentrations for Probe 561 Mihai Bravu

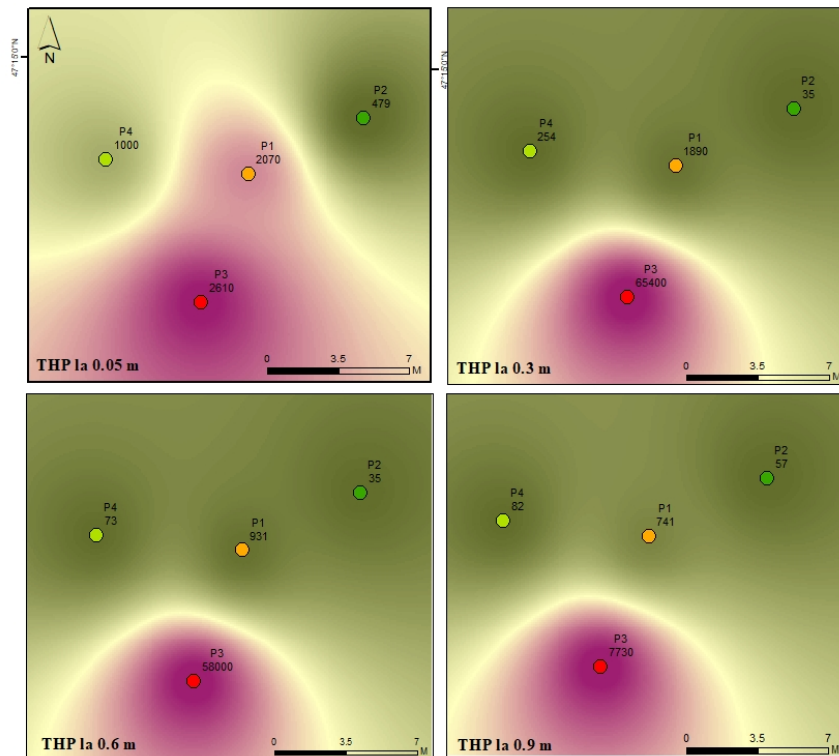

D. Modeled values of TPH concentrations for Probe 682 Suplac

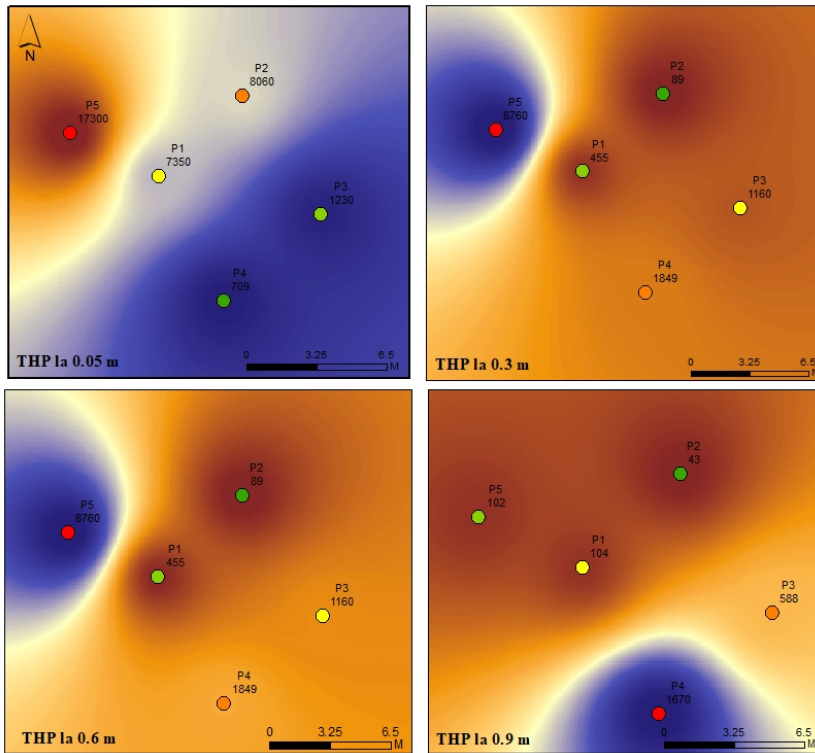

E. Modeled values of TPH concentrations for Probe 921 Suplac

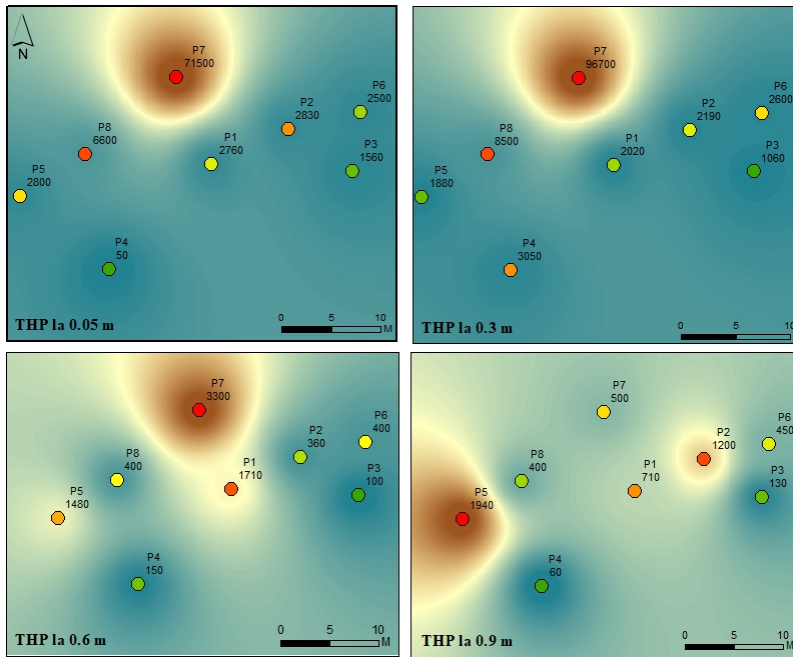

F. Modeled values of TPH concentrations for Probe 514 Borş

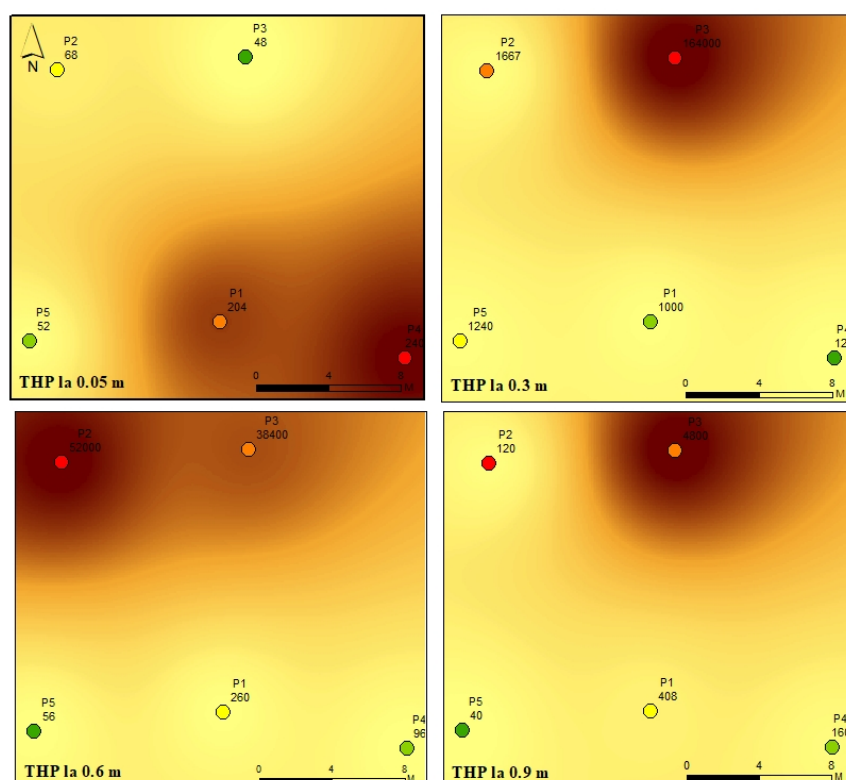

G. Modeled values of TPH concentrations for Probe 515 Borș

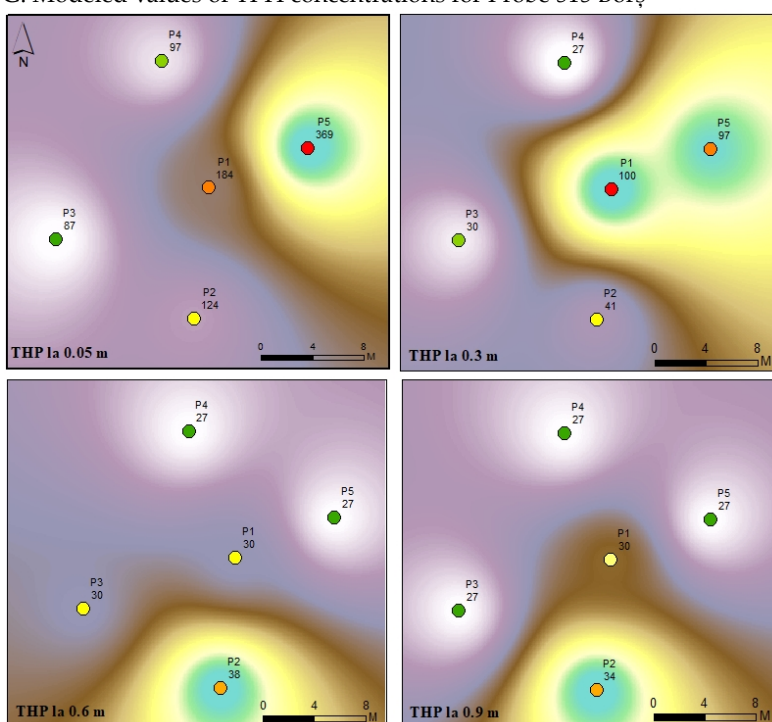

H. Modeled values of TPH concentrations for Probe 805 Scărișoara Nouă

**Supplementary Files Table S1.** The evolution of soil bioremediation from the area of Sonda 251 Scărișoara

| Monitoring<br>twill |   | Weather<br>conditions | Humidi<br>ty | TP | p | Nutrients |    |                  | Aeration                 |
|---------------------|---|-----------------------|--------------|----|---|-----------|----|------------------|--------------------------|
| Date                | S | temperature           |              |    |   | payroll   | NP | manure<br>manure | Backus,<br>crossing<br>s |

|            |    |      |        |     |    |          |       |        |        |
|------------|----|------|--------|-----|----|----------|-------|--------|--------|
| 9/18/2019  | S0 | 29.4 | 23.96% | 789 | 7. |          |       |        |        |
| 9/28/2019  |    |      |        |     | 7. |          | 200kg |        |        |
| 9/29/2019  |    |      |        |     | 7. | 10 bales |       |        |        |
| 10/2/2019  | S2 | 28.9 | 30.20% | 652 | 7. |          |       |        | 1 pass |
| 10/16/2019 | S4 | 27.7 | 32.60% | 559 | 7. |          |       |        |        |
| 11/6/2019  | S7 | 29.8 | 35.00% | 500 | 7. |          |       |        |        |
| 11/10/2019 | S8 |      |        |     | 7. | 11 bales | 100kg | 1600kg | 1 pass |
| 11/16/2019 | S9 | 29.2 | 32.70% | 420 | 7. |          |       |        |        |
| 12/4/2019  | S1 | 30.2 | 30.80% | 351 | 7. |          |       |        |        |
| 12/16/2019 | S1 |      |        |     | 7. |          |       |        | 1 pass |
| 12/18/2019 | S1 | 28.5 | 31.60% | 310 | 7. |          |       |        |        |
| 12/30/2019 | S1 | 28.9 | 28.60% | 235 | 7. |          |       |        |        |
| 1/15/2019  | S1 | 29.5 | 29.20% | 176 | 7. |          |       |        |        |

**Supplementary Files S2.** The evolution of soil bioremediation from the 560 Mihai Bravu Vest Probe area

| Monitoring twill |     | Weather conditions | Humidity | TPH  | pH  | Nutrients |       | Aeration          |  |
|------------------|-----|--------------------|----------|------|-----|-----------|-------|-------------------|--|
| Date             | S   | temperature        |          |      |     | payroll   | NPK   |                   |  |
| 7/9/2019         | S0  | 27.7               | 28.20%   | 8638 | 6.9 |           |       | Backus, crossings |  |
| 7/16/2019        | S1  | 26.5               | 27.60%   | 8003 | 6.9 | 10 bales  | 50kg  |                   |  |
| 7/23/2019        | S2  | 26.9               | 27.20%   |      | 6.9 | 10 bales  | 50kg  |                   |  |
| 7/30/2019        | S3  | 27.3               | 27.00%   | 7362 | 6.9 |           | 100kg | 1 pass            |  |
| 8/6/2019         | S4  | 27.6               | 26.90%   |      | 6.9 |           |       |                   |  |
| 8/13/2019        | S5  | 27.8               | 26.80%   | 6624 | 6.9 |           |       |                   |  |
| 8/20/2019        | S6  | 28.1               | 26.10%   |      | 6.9 |           |       |                   |  |
| 8/27/2019        | S7  | 28.2               | 25.70%   | 6251 | 6.9 |           |       |                   |  |
| 8/30/2019        | S8  | 28.3               | 25.90%   |      | 6.9 | 20 bales  |       | 1 pass            |  |
| 9/10/2019        | S9  | 28.7               | 26.10%   | 5001 | 6.9 |           |       |                   |  |
| 9/17/2019        | S10 | 29.5               | 26.80%   |      | 6.9 |           |       |                   |  |
| 9/24/2019        | S11 | 29.2               | 26.60%   | 4405 | 6.9 |           |       |                   |  |
| 10/1/2019        | S12 | 28.9               | 26.50%   |      | 6.9 |           |       |                   |  |
| 10/8/2019        | S13 | 28.3               | 26.30%   | 3625 | 6.9 |           |       |                   |  |
| 10/15/2019       | S14 | 29.1               | 27.10%   |      | 6.9 |           |       |                   |  |
| 10/19/2019       | S15 | 29.1               | 26.80%   |      | 6.9 |           | 100kg | 1 pass            |  |
| 10/22/2019       | S15 | 29.4               | 26.50%   | 2827 | 6.9 |           |       |                   |  |
| 10/29/2019       | S16 | 28.7               | 25.80%   |      | 6.9 |           |       |                   |  |
| 11/5/2019        | S17 | 26.5               | 26.30%   | 1802 | 6.9 |           |       |                   |  |

**Supplementary Files Table S3.** The evolution of soil bioremediation from the 561 Mihai Bravu Vest Probe area

| Monitoring twill |    | Weather conditions | Humidity | TPH | p | Nutrients |     | Aeration |           |
|------------------|----|--------------------|----------|-----|---|-----------|-----|----------|-----------|
| Date             | S  | temperature        |          |     |   | payroll   | NPK | Backus   | excavator |
| 8/19/2019        | S0 |                    |          |     |   | 15 bales  |     |          |           |
| 8/20/2019        |    |                    |          |     |   | 15 bales  |     |          |           |

|            |    |      |        |     |     |          |       |        |   |
|------------|----|------|--------|-----|-----|----------|-------|--------|---|
| 8/27/2019  | S1 | 27.9 | 25.80% | 817 | 6.9 |          |       |        |   |
| 8/31/2019  | S2 | 28   | 25.90% |     | 6.9 | 10 bales | 200kg | 1 pass |   |
| 9/10/2019  | S3 | 28.1 | 26.30% | 682 | 6.9 |          |       |        |   |
| 9/17/2019  | S4 | 28.6 | 27.10% |     | 6.9 |          |       |        |   |
| 9/24/2019  | S5 | 29.8 | 28.10% | 592 | 6.9 |          |       |        |   |
| 10/1/2019  | S6 | 29.2 | 27.30% |     | 6.9 |          |       |        |   |
| 10/8/2019  | S7 | 29   | 26.90% | 542 | 6.9 |          |       |        |   |
| 10/15/2019 | S8 | 29.4 | 27.50% |     | 6.9 |          |       |        |   |
| 10/19/2019 | S9 |      |        |     | 6.9 |          | 100kg | 1 pass |   |
| 10/22/2019 | S9 | 30.1 | 27.20% | 470 | 6.9 |          |       |        |   |
| 10/29/2019 | S1 | 29.7 | 26.60% |     | 6.9 |          |       |        |   |
| 11/5/2019  | S1 | 28.9 | 26.30% | 400 | 6.9 |          |       |        |   |
| 11/12/2019 | S1 | 28.8 | 26.10% |     | 6.9 |          |       |        |   |
| 11/16/2019 | S1 |      |        |     | 6.9 | 10 bales |       |        | 1 |
| 11/19/2019 | S1 | 27.6 | 26.10% | 300 | 6.9 |          |       |        |   |
| 11/26/2019 | S1 | 27.3 | 26.80% |     | 6.9 |          |       |        |   |
| 12/3/2019  | S1 | 27   | 27.20% | 237 | 6.9 |          |       |        |   |
| 12/10/2019 | S1 | 26.4 | 27.90% |     | 6.9 |          |       |        |   |
| 12/17/2019 | S1 | 25.9 | 28.10% | 182 | 6.9 |          |       |        |   |

**Supplementary Files Table S4.** The evolution of soil bioremediation from the 682 Suplac Probe area

| Monitoring<br>twill |    | Weather<br>conditions<br>temperature | Humidity | TP  | p   | Nutrients |       | Aeration |           |
|---------------------|----|--------------------------------------|----------|-----|-----|-----------|-------|----------|-----------|
| Date                | S  |                                      |          |     |     | payroll   | NPL   | Backus   | excavator |
| 5/20/2019           | S0 | 24.5                                 | 25.90%   | 912 | 7.3 | 5 bales   | 50kg  | 1 pass   |           |
| 5/26/2019           | S1 | 26.1                                 | 28.60%   |     | 7.3 | 5 bales   | 50kg  |          |           |
| 5/31/2019           | S2 | 28.9                                 | 32.10%   | 840 | 7.3 |           |       |          |           |
| 6/7/2019            | S3 | 29.3                                 | 31.40%   |     | 7.3 |           |       |          |           |
| 6/15/2019           | S4 | 31.2                                 | 29.90%   | 701 | 7.3 |           |       |          |           |
| 6/22/2019           | S5 | 31.9                                 | 29.10%   |     | 7.3 |           |       |          |           |
| 6/30/2019           | S6 | 29.7                                 | 26.80%   | 610 | 7.3 |           |       |          |           |
| 7/8/2019            | S7 | 30.1                                 | 26.40%   |     | 7.3 | 10 bales  | 150kg | 1 pass   |           |
| 7/16/2019           | S8 | 27.9                                 | 25.90%   | 446 | 7.3 |           |       |          |           |
| 7/23/2019           | S9 | 27.1                                 | 25.40%   |     | 7.3 |           |       |          |           |

|            |    |      |        |     |     |          |       |        |        |
|------------|----|------|--------|-----|-----|----------|-------|--------|--------|
| 7/30/2019  | S1 | 27.5 | 25.10% | 400 | 7.3 |          |       |        |        |
| 8/6/2019   | S1 | 27.6 | 24.80% |     | 7.3 |          |       |        |        |
| 8/13/2019  | S1 | 26.3 | 24.70% | 282 | 7.3 |          |       |        | 1 pass |
| 8/20/2019  | S1 | 25.9 | 24.50% |     | 7.3 |          |       |        |        |
| 8/27/2019  | S1 | 26.1 | 24.20% | 198 | 7.3 |          |       |        |        |
| Retreat    |    |      |        |     |     |          |       |        |        |
| 9/24/2019  | S1 | 26.3 | 23.20% | 598 | 7.3 |          |       |        |        |
| 10/1/2019  | S1 | 25.4 | 23.20% |     | 7.3 |          |       |        |        |
| 10/8/2019  | S1 | 25.2 | 23.00% | 530 | 7.3 |          |       |        |        |
| 10/15/2019 | S1 | 25.9 | 23.10% |     | 7.3 |          |       |        |        |
| 10/18/2019 | S1 |      |        |     | 7.3 |          | 100kg | 1 pass |        |
| 10/22/2019 | S1 | 26.8 | 23.30% | 418 | 7.3 |          |       |        |        |
| 10/29/2019 | S2 | 26.9 | 23.10% |     | 7.3 |          |       |        |        |
| 11/5/2019  | S2 | 27.3 | 23.00% | 370 | 7.3 |          |       |        |        |
| 11/12/2019 | S2 | 27.2 | 22.90% |     | 7.3 |          |       |        |        |
| 11/16/2019 | S2 |      |        |     | 7.3 | 10 bales |       |        | 1 pass |
| 11/19/2019 | S2 | 26.3 | 21.90% | 294 | 7.3 |          |       |        |        |
| 11/26/2019 | S2 | 25.5 | 22.30% |     | 7.3 |          |       |        |        |
| 12/3/2019  | S2 | 25.2 | 23.80% | 226 | 7.3 |          |       |        |        |
| 12/10/2019 | S2 | 24.9 | 24.50% |     | 7.3 |          |       |        |        |
| 12/17/2019 | S2 | 24.3 | 24.90% | 161 | 7.3 |          |       |        |        |

**Supplementary Files Table S5.** The evolution of soil bioremediation from the 921 Suplac Probe area

| Monitoring<br>twill |    | Weather<br>conditions | Humidity | TP  | p   | Nutrients |      | Aeration |           |
|---------------------|----|-----------------------|----------|-----|-----|-----------|------|----------|-----------|
| Date                | S  |                       |          |     |     | payroll   | NPK  | Backus   | excavator |
| 5/4/2019            | S0 |                       |          |     |     | 5 bales   | 50kg |          |           |
| 5/17/2019           | S3 | 23.8                  | 22.80%   | 860 | 7.1 |           |      | 1 pass   |           |
| 5/26/2019           | S4 | 24.2                  | 25.90%   |     | 7.1 |           |      |          |           |
| 5/31/2019           | S5 | 29.5                  | 30.10%   | 763 | 7.1 |           |      |          |           |
| 6/7/2019            | S6 | 32                    | 28.50%   |     | 7.1 |           |      |          |           |
| 6/15/2019           | S7 | 32.1                  | 27.30%   | 660 | 7.1 |           |      |          |           |
| 6/22/2019           | S8 | 32.7                  | 27.10%   |     | 7.1 |           |      |          |           |
| 6/30/2019           | S9 | 32.4                  | 29.10%   | 513 | 7.1 |           |      |          |           |

|            |    |      |        |     |     |          |       |        |        |
|------------|----|------|--------|-----|-----|----------|-------|--------|--------|
| 7/7/2019   | S1 | 32.6 | 28.70% |     | 7.1 | 10       | 150kg | 1 pass |        |
| 7/16/2019  | S1 | 28.1 | 28.60% | 372 | 7.1 |          |       |        |        |
| 7/23/2019  | S1 | 28.4 | 28.30% |     | 7.1 |          |       |        |        |
| 7/30/2019  | S1 | 29   | 28.20% | 332 | 7.1 |          |       |        |        |
| 8/6/2019   | S1 | 29.1 | 28.00% |     | 7.1 |          |       |        |        |
| 8/13/2019  | S1 | 28.3 | 27.90% | 248 | 7.1 |          |       |        | 1 pass |
| 8/20/2019  | S1 | 27.5 | 27.50% |     | 7.1 |          |       |        |        |
| 8/27/2019  | S1 | 27.6 | 27.10% | 186 | 7.1 |          |       |        |        |
| Retreat    |    |      |        |     |     |          |       |        |        |
| 9/24/2019  | S1 | 28.5 | 27.00% | 610 | 7.1 |          |       |        |        |
| 10/1/2019  | S2 | 28.4 | 26.10% |     | 7.1 |          |       |        |        |
| 10/8/2019  | S2 | 26.9 | 25.90% | 538 | 7.1 |          |       |        |        |
| 10/15/2019 | S2 | 28.1 | 26.30% |     | 7.1 |          |       |        |        |
| 10/18/2019 | S2 |      |        |     | 7.1 |          | 100kg | 1 pass |        |
| 10/22/2019 | S2 | 29.4 | 26.20% | 380 | 7.1 |          |       |        |        |
| 10/29/2019 | S2 | 29.2 | 25.90% |     | 7.1 |          |       |        |        |
| 11/5/2019  | S2 | 28.8 | 25.80% | 350 | 7.1 |          |       |        |        |
| 11/12/2019 | S2 | 29.1 | 25.20% |     | 7.1 |          |       |        |        |
| 11/16/2019 | S2 |      |        |     | 7.1 | 10 bales |       |        | 1 pass |
| 11/19/2019 | S2 | 28.2 | 23.30% | 258 | 7.1 |          |       |        |        |
| 11/26/2019 | S2 | 27.8 | 23.60% |     | 7.1 |          |       |        |        |
| 12/3/2019  | S2 | 27.2 | 24.30% | 220 | 7.1 |          |       |        |        |
| 12/10/2019 | S3 | 26.7 | 24.60% |     | 7.1 |          |       |        |        |
| 12/17/2019 | S3 | 26.4 | 25.10% | 182 | 7.1 |          |       |        |        |

**Supplementary Files Table S6.** The evolution of soil bioremediation from the 514 Borş Probe area

| Monitoring twill |    | Weather conditions | Humidity | TPH | p | Nutrients |      |                  | aeration |           |
|------------------|----|--------------------|----------|-----|---|-----------|------|------------------|----------|-----------|
| Date             | S  | temperature        |          |     |   | payroll   | NPK  | garbage<br>grajd | Backus   | excavator |
| 12/4/2020        | S0 |                    |          |     |   | 10 bales  | 50kg | 500kg            |          |           |
| 12/7/2020        | S1 |                    |          |     |   | 10 bales  | 50kg | 500kg            |          |           |



|            |     |      |        |       |    |          |       |  |        |        |
|------------|-----|------|--------|-------|----|----------|-------|--|--------|--------|
| 12/10/2020 | S1  | 28.8 | 29.90% | 7863  | 6. |          |       |  |        |        |
| 12/15/2020 | S2  |      |        |       | 6. |          |       |  | 1 pass |        |
| 12/18/2020 | S2  | 29.2 | 30.90% | 7114  | 6. |          |       |  |        |        |
| 12/30/2020 | S4  | 30.4 | 31.10% | 6306  | 6. |          |       |  |        |        |
| 1/15/2021  | S6  | 29.6 | 30.30% | 5109  | 6. |          |       |  |        |        |
| 1/29/2021  | S8  | 28.3 | 31.40% | 4483  | 6. |          |       |  |        |        |
| 2/12/2021  | S10 | 27.9 | 31.20% | 3628  | 6. |          |       |  |        |        |
| 2/23/2021  | S12 |      |        |       | 6. | 15 bales | 100kg |  |        | 1 pass |
| 2/26/2021  | S12 | 28.9 | 29.10% | 2501  | 6. |          |       |  |        |        |
| 3/8/2021   | S14 |      |        |       | 6. | 5 bales  | 50kg  |  | 1 pass |        |
| 3/30/2021  | S16 | 30.4 | 28.50% | 1696  | 6. |          |       |  |        |        |
| Retreat    |     |      |        |       |    |          |       |  |        |        |
| 4/16/2021  | S18 |      |        |       | 6. |          |       |  |        |        |
| 4/29/2021  | S20 | 28.4 | 31.60% | 11080 | 6. |          |       |  |        |        |
| 5/14/2021  | S22 |      |        |       | 6. | 10 bales | 100kg |  | 1 pass |        |
| 5/17/2021  | S23 | 29.1 | 29.10% | 7962  | 6. |          |       |  |        |        |
| 5/26/2021  | S24 | 26.5 | 30.80% |       | 6. |          |       |  |        |        |
| 5/31/2021  | S25 | 29.3 | 30.20% | 6231  | 6. |          |       |  |        |        |
| 6/7/2021   | S27 | 29.8 | 29.90% |       | 6. |          |       |  |        |        |
| 6/15/2021  | S28 | 31.2 | 29.10% | 4384  | 6. |          |       |  |        |        |
| 6/22/2021  | S29 | 31.8 | 28.50% |       | 6. |          |       |  |        |        |
| 6/30/2021  | S30 | 27.9 | 29.10% | 3512  | 6. |          |       |  |        |        |
| 7/9/2021   | S31 | 28.4 | 28.70% |       | 6. | 10 bales | 150kg |  | 1 pass |        |
| 7/16/2021  | S32 | 27.5 | 28.50% | 3009  | 6. |          |       |  |        |        |
| 7/23/2021  | S33 | 27.9 | 28.30% |       | 6. |          |       |  |        |        |
| 7/30/2021  | S34 | 28.3 | 28.00% | 2871  | 6. |          |       |  |        |        |
| 8/6/2021   | S35 | 28.2 | 27.60% |       | 6. |          |       |  |        |        |
| 8/13/2021  | S36 | 28.5 | 27.30% | 2189  | 6. |          |       |  |        |        |
| 8/20/2021  | S37 | 29   | 26.80% |       | 6. |          |       |  |        |        |
| 8/27/2021  | S38 | 28.7 | 26.30% | 1304  | 6. |          |       |  |        |        |

**Supplementary Files Table S7.** The evolution of soil bioremediation from the 515 Borş Probe area

| Monitoring twill |     | Weather conditions | Humidity | TPH  | pH  | Nutrients |       | aeration          |           |
|------------------|-----|--------------------|----------|------|-----|-----------|-------|-------------------|-----------|
| Date             | S   | temperature        |          |      |     | payroll   | NPK   | Backus, crossings | excavator |
| 5/5/2020         | S0  |                    |          |      |     | 10 bales  | 100kg |                   |           |
| 5/17/2020        | S2  | 24.1               | 22.60%   | 8974 | 6.7 |           |       | 1 pass            |           |
| 5/26/2020        | S3  | 26.1               | 25.80%   |      | 6.7 |           |       |                   |           |
| 5/31/2020        | S4  | 32.4               | 29.50%   | 7916 | 6.7 |           |       |                   |           |
| 6/7/2020         | S5  | 32.8               | 28.70%   |      | 6.7 |           |       |                   |           |
| 6/15/2020        | S6  | 33.4               | 27.90%   | 6002 | 6.7 |           |       |                   |           |
| 6/22/2020        | S7  | 33.7               | 27.30%   |      | 6.7 |           |       |                   |           |
| 6/30/2020        | S8  | 32.9               | 28.40%   | 5013 | 6.7 |           |       |                   |           |
| 7/7/2020         | S9  | 33.6               | 27.80%   |      | 6.7 | 10 bales  | 150kg | 1 pass            |           |
| 7/16/2020        | S10 | 27.9               | 27.50%   | 4001 | 6.7 |           |       |                   |           |
| 7/23/2020        | S11 | 28.1               | 27.40%   |      | 6.7 |           |       |                   |           |
| 7/30/2020        | S12 | 28.5               | 27.20%   | 3519 | 6.7 |           |       |                   |           |
| 8/6/2020         | S13 | 28.9               | 26.80%   |      | 6.7 |           |       |                   |           |
| 8/12/2020        | S14 | 26.5               | 26.70%   |      | 6.7 |           |       |                   | 1 pass    |
| 8/13/2020        | S14 | 26.7               | 26.40%   | 2461 | 6.7 |           |       |                   |           |
| 8/20/2020        | S15 | 26.8               | 26.30%   |      | 6.7 |           |       |                   |           |
| 8/27/2020        | S16 | 26.5               | 26.00%   | 1571 | 6.7 |           |       |                   |           |
| Retreat          |     |                    |          |      |     |           |       |                   |           |
| 9/24/2020        | S17 | 28.3               | 24.00%   | 6001 | 6.7 |           |       |                   |           |
| 10/1/2020        | S18 | 27.9               | 23.80%   |      | 6.7 |           |       |                   |           |
| 10/8/2020        | S19 | 27.7               | 23.50%   | 5429 | 6.7 |           |       |                   |           |
| 10/15/2020       | S20 | 29.5               | 23.90%   |      | 6.7 |           |       |                   |           |
| 10/18/2020       | S22 |                    |          |      | 6.7 |           | 50kg  | 1 pass            |           |
| 10/22/2020       | S22 | 27.1               | 24.20%   | 3804 | 6.7 |           |       |                   |           |
| 10/29/2020       | S23 | 28.2               | 23.90%   |      | 6.7 |           |       |                   |           |
| 11/5/2020        | S24 | 27.8               | 23.40%   | 3235 | 6.7 |           |       |                   |           |
| 11/12/2020       | S25 | 26.8               | 23.20%   |      | 6.7 |           |       |                   |           |
| 11/16/2020       | S26 |                    |          |      | 6.7 | 10 bales  |       |                   | 1 pass    |
| 11/19/2020       | S26 | 25.5               | 22.80%   | 2608 | 6.7 |           |       |                   |           |
| 11/26/2020       | S27 | 24.3               | 23.90%   |      | 6.7 |           |       |                   |           |
| 12/3/2020        | S28 | 23.7               | 24.20%   | 2190 | 6.7 |           |       |                   |           |
| 12/10/2020       | S29 | 23.2               | 25.10%   |      | 6.7 |           |       |                   |           |
| 12/17/2020       | S30 | 23.1               | 26.50%   | 1588 | 6.7 |           |       |                   |           |

**Supplementary Files Table S8.** The evolution of soil bioremediation from the 805 Scărișoara Nouă Probe area

| Monitoring twill |    | Weather conditions | Humidity | TPH  | pH | Nutrients |       | aeration          |
|------------------|----|--------------------|----------|------|----|-----------|-------|-------------------|
| Date             | S  | temperature        |          |      |    | payroll   | NPK   |                   |
| 7/2/2019         | S1 |                    |          |      |    |           |       | Backus, crossings |
| 7/9/2019         | S2 | 27.1               | 28.90%   | 8798 | 7  | 10 bales  | 50kg  | 1 pass            |
| 7/16/2019        | S3 | 26.9               | 28.30%   | 8122 | 7  | 10 bales  | 50kg  |                   |
| 7/23/2019        | S4 | 27.4               | 27.90%   |      | 7  |           | 100kg |                   |
| 7/30/2019        | S5 | 27.8               | 27.20%   | 7462 | 7  |           |       |                   |

|            |     |      |        |      |   |          |       |        |
|------------|-----|------|--------|------|---|----------|-------|--------|
| 8/6/2019   | S6  | 28.2 | 27.00% |      | 7 |          |       |        |
| 8/13/2019  | S7  | 28.3 | 26.90% | 6641 | 7 |          |       |        |
| 8/20/2019  | S8  | 28.5 | 26.80% |      | 7 |          |       |        |
| 8/27/2019  | S9  | 28.8 | 26.10% | 5998 | 7 |          |       |        |
| 8/31/2019  | S10 | 28.9 | 26.70% |      | 7 | 10 bales | 100kg | 1 pass |
| 9/1/2019   | S10 | 28.9 | 26.70% |      | 7 |          |       | 1 pass |
| 9/10/2019  | S11 | 29.2 | 26.90% | 4759 | 7 |          |       |        |
| 9/17/2019  | S12 | 30.4 | 26.90% |      | 7 |          |       |        |
| 9/24/2019  | S13 | 31.4 | 27.00% | 4010 | 7 |          |       |        |
| 10/1/2019  | S14 | 29.2 | 26.90% |      | 7 |          |       |        |
| 10/8/2019  | S15 | 28.4 | 26.30% | 3602 | 7 |          |       |        |
| 10/15/2019 | S16 | 29.6 | 27.40% |      | 7 |          |       |        |
| 10/18/2019 | S17 | 29.7 | 27.20% |      | 7 |          | 100kg | 1 pass |
| 10/22/2019 | S17 | 30.1 | 26.90% | 2362 | 7 |          |       |        |
| 10/29/2019 | S18 | 29.2 | 25.20% |      | 7 |          |       |        |
| 11/5/2019  | S19 | 28.1 | 26.30% | 1398 | 7 |          |       |        |

**Disclaimer/Publisher's Note:** The statements, opinions and data contained in all publications are solely those of the individual author(s) and contributor(s) and not of MDPI and/or the editor(s). MDPI and/or the editor(s) disclaim responsibility for any injury to people or property resulting from any ideas, methods, instructions, or products referred to in the content.
